# Supplementary material for: Partially stripped insulated nanowires: a lightly substituted hexa-peri-hexabenzocoronene-based columnar liquid crystal
Source: Royal Society of Chemistry journal article supplement (doi:10.1039/b311651d), 2004-01-01
Supplement: b311651d.doc [file b311651d.doc]

EXPERIMENTAL SECTION

General

1H-NMR and 13C-NMR spectra were recorded in deuterated solvents such as CD2Cl2, C2D2Cl4 on a Bruker DPX 250 and Bruker DRX 500. UV-Vis spectra were recorded on a Perkin-Elmer Lambda 9 spectrophotometer at room temperature. Fluorescence spectra were recorded on a Spex Fluorolog II (212). FD mass spectra were obtained on a VG Instruments ZAB 2-SE-FPD. High-resolution MALDI mass spectra were recorded on a Bruker Reflex II-TOF Spectrometer using a 337 nm nitrogen laser with TCNQ as matrix. Differential scanning calorimetry (DSC) was measured on a Mettler DSC 30 with heating and cooling rate of 10 K/min. Powder wide-angle x-ray diffraction (WAXD) experiments were performed using a Siemens D 500 Kristalloflex with graphite-monochromatized CuKαX-Ray beam, emitting from a Rigaku RV-300 rotating anode. 2-D X-ray diffraction of oriented fibers was conducted using a rotating anode (Rigaku, 18kw) X-ray beam (CuK, pinhole collimation, double graphite monochromator) with the beam perpendicular to the fiber axis and CCD or film camera. Unless otherwise noted, all starting materials were purchased from Aldrich, Acros, ABCR, and used as received.

*5-Bromo-1, 2, 3-tris-dodecyloxy-benzene (3)*

4.9 g 5-bromo-1, 2, 3-trimethoxy-benzene (1, 20 mmol) was dissolved in 40 ml dichloromethane and the solution was cooled to –78°C, followed by the slow addition of 60 ml BBr3 (1 M in DCM). The mixture was allowed to warm to room temperature over 3h and stirred for 28h. The reaction was quenched with ice-water and the mixture was extracted with ethyl acetate (40mlx2). The organic layer was washed with water three times, dried over magnesium and concentrated under reduced pressure to 3.4 g 5-bromo-1, 2, 3-trihydoxy-benzene (2) as a white solid, which was directly submitted to the next reaction. 2.5 g of this solid was dissolved in 60 ml DMF and the solution was degassed by bubbling argon for 15 min, then 13.46 g K2CO3 (97.5 mmol) was added. The mixture was stirred at room temperature for 30 min, and then 13.61 g 1-bromododecane (54.6 mmol) was added. The mixture was heated to 60 °C for 4 h. After cooling, the mixture was poured into 100 ml ice-water and the white precipitate was collected, followed by column chromatography (silca gel, PE/DCM= 4:1) to afford 7.31 g pure product (85%) as white powder. 1H-NMR δ (250 MHz, CD2Cl2): 6.66 (s, 2H), 3.89 (m, 6H), 1.76 (m, 6H), 1.40 (m, 6H), 1.25 (m, 48H), 0.86 (t, 9H) 13C-NMR δ (125 MHz, CD2Cl2): 154.25, 137.65, 115.74, 110.17, 73.71, 69.61, 32.32, 30.12, 30.08, 30.04, 30.01, 29.75, 29.66, 26.48, 26.43, 23.08, 14.26. FD-MS (8KV): 710.9(M+), cal. 709.98.

*1, 2, 3-Tris-dodecyloxy-5-phenylethynyl-benzene (4)*

To a 50 ml two-neck flask was added 1.5g compound 3 (2,11mmol), 122 mg Pd(PPh3)4 (5 mol%), 40mg of CuI (10 mol%) and 30 ml piperidine. The mixture was degassed by two “freeze-pump-thaw” cycles, then 430mg phenylacetylene (4.22 mmol) was added and the whole heated to 80 ºC overnight. After cooling, the reaction was quenched with 20ml 2N aqueous ammonium chloride. The mixture was extracted with dichloromethane (40mlx2), and the organic layer washed with water three times, dried over magnesium sulfate, concentrated under reduced pressure, and the residue was purified by column chromatography (silica gel, PE/DCM = 4:1) to give 1.3g of compound 4 (85%). 1H-NMR δ (250 MHz, CD2Cl2): 7.52 (m, 2H), 7.36 (m, 3H), 6.73 (s, 2H), 3.96 (m, 6H), 1.80 (m, 6H), 1.40 (m, 6H), 1.25 (m, 48H), 0.85 (t, 9H). FD-MS (8KV): 730.7(M+), cal. 731.2.

*1-(3, 4, 5-Tris-dodecyloxy-phenyl)-2, 3, 4, 5, 6-pentaphenylbenzene (5)*

1.2 g compound 4 (1.64 mmol) and 0.63 g (1.64 mmol) 2, 3, 4, 5-Tetraphenyl-cyclopenta-2, 4-dienone were suspended in 1.5 ml diphenylether and refluxed for 6 hours under Ar atmosphere. After cooling, diphenylether was removed under reduced pressure and the residue was purified by column chromatography (silica gel, PE/DCM = 7:3) to give 1.60g of compound 5 (90%). 5: 1H-NMR δ (250MHZ, CD2Cl2, 293K): 6.84-6.88 (m, 25H), 5.98 (s, 2H), 3.68 (t, 2H), 3.44 (t, 4H), 1.53 (m, 6H), 1.25 (m, 54H), 0.87 (t, 9H). 13C-NMR δ (62.5MHZ, CD2Cl2, 293K): 151.87, 141.35, 141.16, 141.10, 140.76, 140.65, 140.60, 136.06, 135.51, 131.79, 131.75, 131.64, 126.99, 126.89, 125.63, 125.56, 111.62, 73.24, 69.28, 32.33, 30.35, 30.10, 30.06, 19.97, 29.77, 29.72, 29.56, 26.38, 23.08, 14.26. FD-MS (8KV): 1087.0(M+), cal. 1087.68.

*1, 2, 3-Tris- dodecyloxy-hexa-peri-hexabenzocoronene (6)*

A 250 ml two-necked flask was charged with 0.398 g (0.36 mmol) of compound 5 and 150ml dichloromethane. Using a glass capilliary, a constant stream of Ar was bubbled through the solution. Then, 1.19 g (7.34 mmol) of FeCl3 dissolved in 3 ml nitromethane was added dropwise using a syringe. After 30 minutes, the mixture was quenched with a large excess of methanol and the precipitate was filtered. The residue was purified by column chromatography (silica gel, PE/DCM = 3:1) to give 0.275 (70%) title product 6 as bright yellow powder. 1H-NMR δ (250MHZ, C2D4Cl2, 293K): 9.86(d, 2H), 8.45-8.59 (m, 4H), 8.12-8.19 (m, 4H), 7.84(t, 2H), 7.57 (m, 2H), 7.54 (m, 2H), 7.33 (m, 1H), 4.53 (t, 2H), 4.03 (t, 4H), 1.96-2.09 (m, 6H), 1.34-1.72 (m, 54H), 0.82 (t, 9H). 13C-NMR δ (62.5MHZ, C2D4Cl2 , 293K): 151.18, 147.17, 129.72, 129.30, 129.23, 128.85, 126.80, 126.28, 124.83, 124.43, 123.96, 121.22, 121.04, 120.18, 120.11, 119.82, 75.30, 75.09, 32.30, 31.07, 30.29, 30.23, 30.14, 30.08, 29.80, 29.77, 26.89, 26.76, 23.08, 14.59. MALDI-TOF (TCNQ as matrix): m/z(%) = 1074(100) ( calcd for C78H90O3 = 1075.59)

**Figure S1**. Differential scanning calorimetry traces of “unwrapped” HBC **6.**

**Figure S2**. MALDI-Mass spectrum of “unwrapped” HBC **6.**

MS (MALDI TOF):calcd. m/z (%): 1074.69 (100.00), 1075.69 (88.22), 1076.69 (39.03), 1077.69 (11.54); found: 1074.19 (100.00), 1075.19 (80.53), 1076.20 (27.61), 1077.14 (13.40).
